# Supplementary material for: An improved method for identifying functionally linked proteins using phylogenetic profiles
Source: Springer Nature journal article supplement (doi:10.1186/1471-2105-8-s4-s7), 2007-05-01
Supplement: 12859_2007_1910_MOESM2_ESM.pdf [file 12859_2007_1910_MOESM2_ESM.pdf]

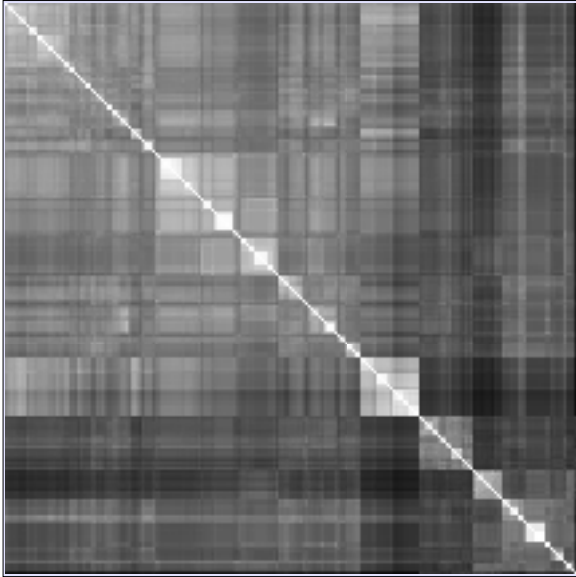

Jaccard organism-organism distance matrix just after *Mathematica* hierarchical clustering with complete linkage

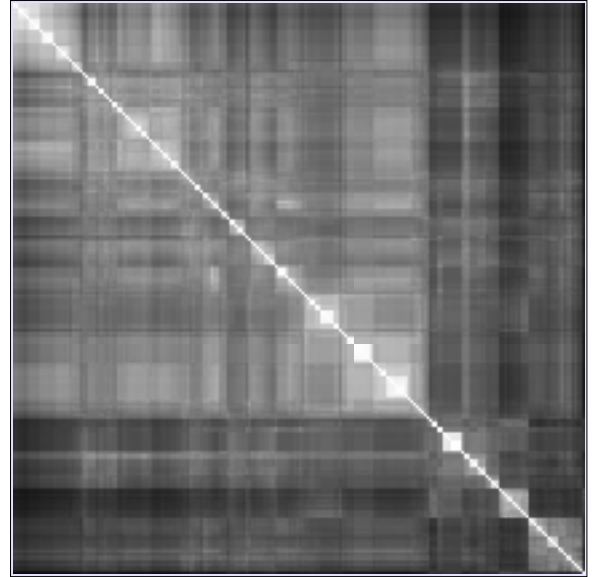

Jaccard organism-organism distance matrix after hierarchical clustering with complete linkage and optimal swivelling to minimize sum of squares of Jaccard dissimilarities of adjacent organisms
