# Supplementary material for: An improved method for identifying functionally linked proteins using phylogenetic profiles
Source: Springer Nature journal article supplement (doi:10.1186/1471-2105-8-s4-s7), 2007-05-01

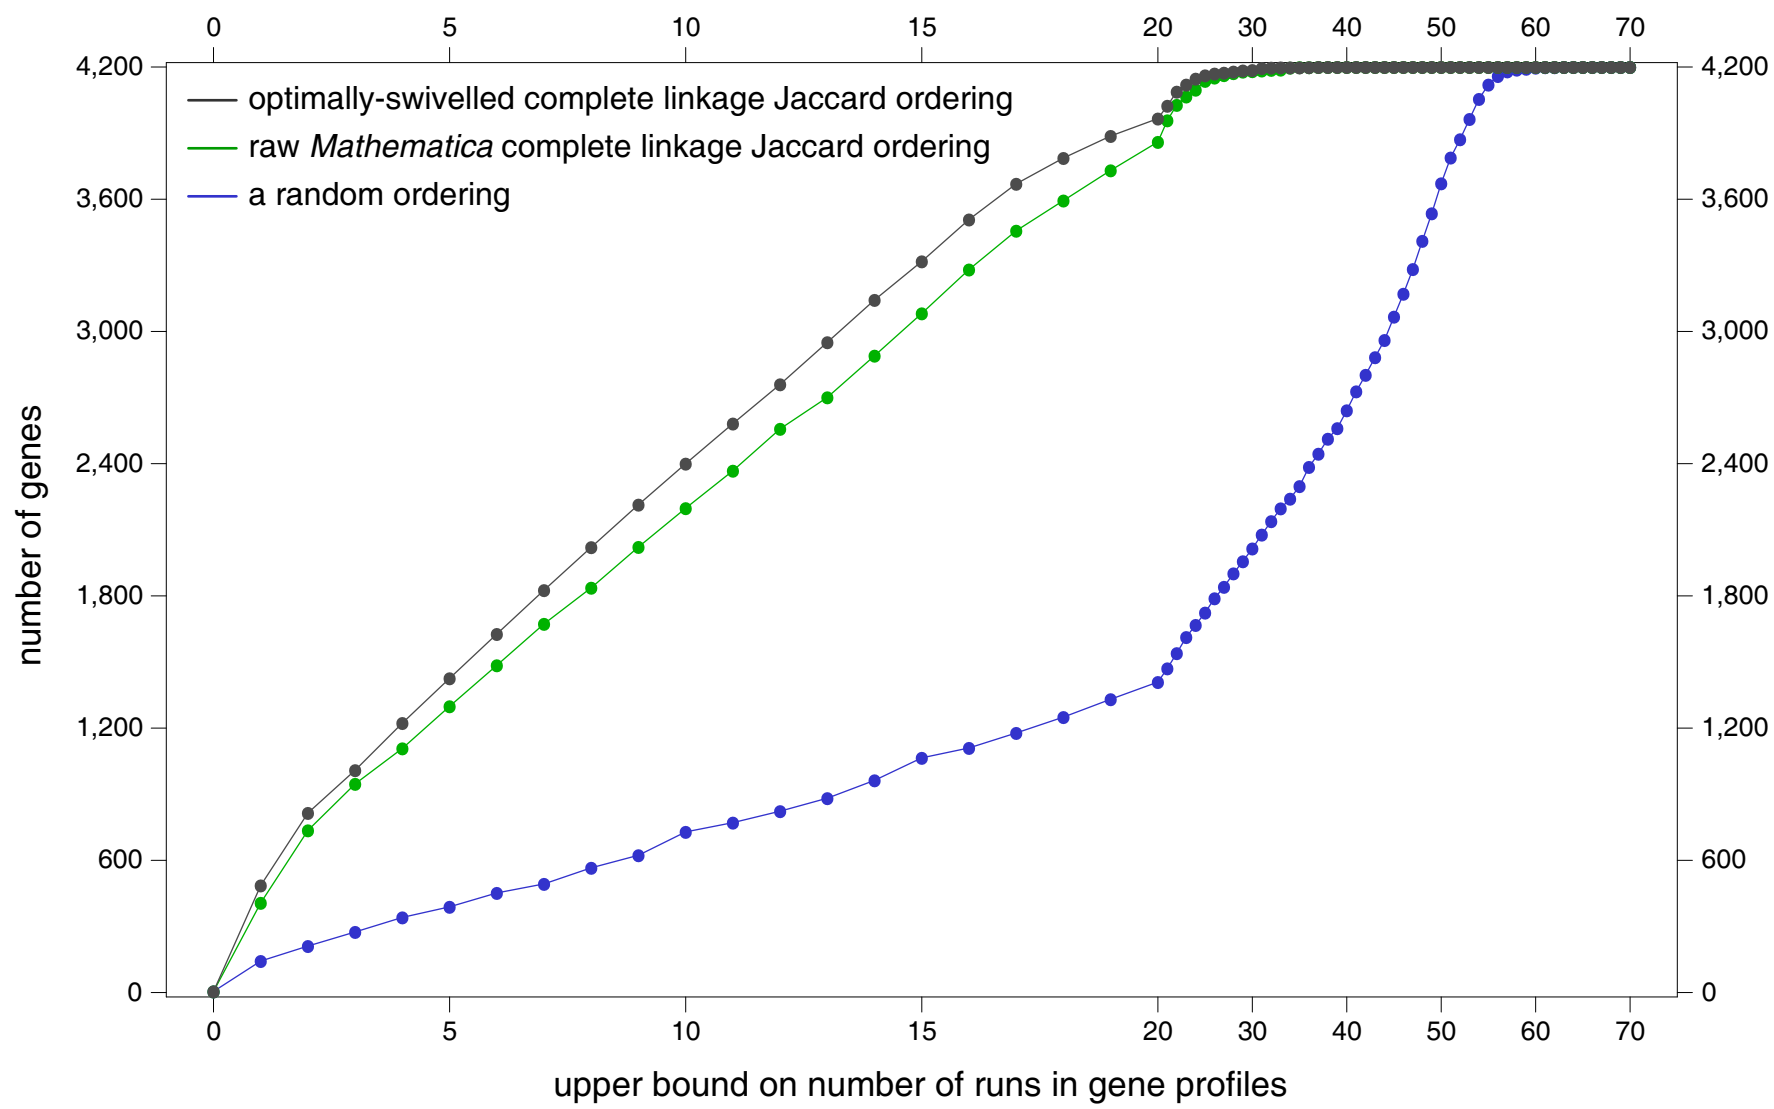

Supplement: 12859_2007_1910_MOESM3_ESM.pdf [file 12859_2007_1910_MOESM3_ESM.pdf]
